# Supplementary material for: Allanite U–Th–Pb geochronology by ion microprobe
Source: Royal Society of Chemistry journal article supplement (doi:10.1039/c9ja00426b), 2020-01-01
Supplement: c9ja00426b2.xlsx [file c9ja00426b2.xlsx]

## Sheet: Table1
sample	SiO2	Al2O3	MgO	Y2O3	La2O3	Ce2O3	Cr2O3	Sm2O3	FeO	Dy2O3	MnO	CaO	TiO2	ThO2	Pr2O3	Nd2O3	SrO	Gd2O3	Total
TARA
TARA@01	31.5	13.447	1.162	0.241	4.881	10.149	0.01	0.374	14.871	0.188	0.791	10.669	1.164	1.518	0.962	3.828	0.218	1.638	97.661
TARA@02	31.546	13.594	1.236	0.245	5.054	10.403	0	0.396	14.642	0.015	0.873	10.53	1.213	1.507	0.962	3.783	0.242	1.472	97.712
TARA@03	31.776	12.999	1.224	1.345	3.68	9.353	0	0.561	15.852	0.13	0.845	11.194	1.354	0.677	1.257	4.077	0.077	1.54	97.97
TARA@04	31.807	14.246	1.472	0.152	6.694	11.346	0	0.364	13.677	0	0.792	10.224	1.094	1.234	0.989	2.952	0.163	1.571	98.841
TARA@05	31.601	14.115	1.411	0.08	6.641	11.286	0	0.093	14	0	0.744	10.251	1.161	1.3	0.952	3.011	0.224	1.472	98.401
TARA@06	31.547	13.935	1.306	0.149	6.022	11.143	0	0.441	13.986	0	0.773	10.464	1.019	1.228	0.997	3.452	0.242	1.541	98.245
TARA@07	31.125	13.868	1.359	0.087	6.323	10.87	0	0.231	14.004	0.223	0.758	10.252	1.111	1.229	1.027	3.258	0.052	1.521	97.373
TARA@08	31.553	13.685	1.274	0.137	5.985	10.947	0	0.422	14.378	0.01	0.728	10.49	1.037	1.324	0.991	3.277	0.213	1.538	98.021
TARA@09	31.52	13.758	1.258	0.188	5.594	10.903	0	0.544	14.431	0	0.87	10.311	1.02	1.146	1.216	3.731	0.217	1.449	98.158
TARA@10	31.519	14.076	1.229	0.191	5.02	10.494	0	0.385	14.457	0.109	0.945	10.38	1.022	1.249	1.135	3.879	0.248	1.501	97.839
CAP
CAP@01	31.58	15.617	0.928	0.205	6.061	11.414	0	0.486	13.137	0.025	0.468	9.88	0.829	1.538	0.936	4.015	0.223	1.685	99.026
CAP@02	31.788	15.783	0.871	0.216	5.95	11.542	0	0.394	12.976	0.237	0.482	10.155	0.764	1.019	1.145	4.092	0.111	1.703	99.231
CAP@03	32.253	17.233	0.736	0.167	4.576	9.313	0.034	0.364	14.004	0.094	0.373	8.678	1.12	1.694	0.992	3.708	0.13	1.491	96.961
CAP@04	31.847	15.616	0.818	0.23	5.54	10.939	0	0.566	12.928	0	0.52	10.264	0.826	1.062	1.244	4.148	0.191	1.487	98.234
CAP@05	31.353	15.099	0.843	0.554	5.238	10.255	0	0.562	13.559	0.301	0.91	9.348	0.761	1.614	1.044	4.132	0.145	1.766	97.58
CAP@06	31.662	15.535	0.82	0.577	5.415	10.636	0	0.648	13.877	0.143	0.888	9.443	0.735	1.496	1.176	4.204	0.178	1.641	99.073
CAP@07	31.882	15.694	0.984	0.104	6.661	11.711	0	0.553	13.104	0	0.371	10.079	0.905	0.927	1.119	3.782	0.229	1.664	99.828
CAP@08	31.747	14.656	0.726	0.364	4.693	9.77	0	0.596	10.16	0.045	0.398	11.154	1.136	2.076	1.198	4.376	0.302	1.639	95.038
CAP@09	32.283	15.095	0.655	0.207	4.706	9.97	0	0.567	10.62	0	0.44	11.482	1.151	2.313	1.201	4.333	0.18	1.685	96.889
CAP@10	31.71	15.991	0.919	0.265	5.552	11.127	0	0.543	13.159	0.074	0.571	10.031	0.792	1.435	1.197	4.114	0.2	1.814	99.608
SQ-51
SQ-51@01	33.365	16.109	0.262	0.082	5.853	8.829	0	0.026	15.619	0.005	0.142	14.207	0.547	0.018	0.581	1.544	0.174	1.158	98.521
SQ-51@02	33.686	17.266	0.135	0.156	5.619	8.265	0	0.167	14.555	0	0.146	14.644	0.36	0.078	0.539	1.597	0.168	1.146	98.528
SQ-51@03	33.812	17.494	0.179	0.157	5.646	8.3	0	0.151	14.748	0	0.186	14.86	0.351	0.042	0.774	1.54	0.114	1.077	99.43
SQ-51@04	33.475	16.846	0.196	0.025	5.822	8.512	0	0.146	15.244	0	0.158	14.561	0.464	0.096	0.596	1.572	0.153	1.13	98.997
SQ-51@05	33.509	16.958	0.201	0.003	5.5	8.082	0	0.114	15.32	0	0.134	15.009	0.4	0	0.64	1.49	0.192	0.958	98.534
SQ-51@06	33.6	17.1	0.2	0.003	5.6	8	0.008	0.1	15.2	0	0.1	14.9	0.4	0	0.6	1.6	0.186	1.1	98.7
SQ-51@07	33.736	16.582	0.186	0.013	5.517	8.247	0	0	15.462	0.211	0.136	14.878	0.457	0.079	0.648	1.616	0.088	1.002	98.858
SQ-51@08	34.388	17.524	0.163	0.29	4.389	6.562	0.001	0.063	14.962	0	0.122	16.159	0.404	0	0.509	1.478	0.201	0.899	98.113
SQ-51@09	33.914	17.106	0.189	0.064	5.439	7.736	0	0.026	15.216	0	0.164	15.092	0.371	0.131	0.698	1.508	0.201	1.036	98.892
SQ-51@10	34.473	17.065	0.184	0.013	5.356	7.767	0	0.271	15.11	0.03	0.13	15.362	0.456	0.024	0.713	1.51	0.038	1.12	99.645
Daibosatsu
Daibosatsu@01	31.789	14.591	0.375	0.486	6.615	12.314	0	0.256	15.921	0.138	1.087	9.046	0.939	1.001	0.954	2.8	0.225	1.727	100.263
Daibosatsu@02	31.237	14.494	0.363	0.556	6.36	12.125	0	0.483	15.654	0.466	1.079	8.687	0.868	1.203	0.982	2.706	0.239	1.732	99.277
Daibosatsu@03	31.639	14.544	0.347	0.499	6.302	12.21	0	0.292	16.029	0.242	1.036	8.924	0.893	1.019	0.978	2.774	0.115	1.74	99.586
Daibosatsu@04	31.509	14.569	0.396	0.489	6.382	12.063	0	0.424	15.793	0.37	1.025	8.962	0.904	1.161	0.975	2.778	0.08	1.729	99.609
Daibosatsu@05	31.865	14.681	0.371	0.525	6.253	12.001	0	0.444	15.739	0	1.014	8.892	0.9	1.017	0.81	2.782	0.135	1.761	99.188
Daibosatsu@06	32.066	14.764	0.356	0.602	6.442	11.999	0	0.206	15.986	0.214	1.049	8.947	0.911	1.088	0.977	2.78	0.212	1.665	100.338
Daibosatsu@07	31.56	14.497	0.374	0.516	6.48	12.333	0	0.307	15.947	0.005	1.058	8.816	0.909	1.058	0.859	2.828	0.196	1.783	99.526
Daibosatsu@08	31.738	14.655	0.327	0.597	6.467	12.095	0	0.097	15.823	0	1.079	8.907	0.901	1.097	0.951	2.803	0.151	1.802	99.543
Daibosatsu@09	31.546	14.464	0.385	0.538	6.472	12.115	0	0.379	15.65	0.203	1.004	8.919	0.931	0.873	0.98	2.597	0.229	1.685	98.977
Daibosatsu@10	31.74	14.597	0.394	0.538	6.475	12.261	0	0.521	15.961	0.094	1.088	8.99	0.931	1.114	0.967	2.599	0.176	1.67	100.13
Toba
Toba@1	32.098	14.362	0.992	0.127	6.639	10.886	0	0.373	15.466	0	0.534	10.65	1.063	1.341	0.982	2.694	0.233	1.46	99.994
Toba@2	31.281	13.54	0.936	0.241	6.106	10.418	0	0.385	15.824	0.115	0.722	10.366	1.213	2.468	1.115	3.082	0.165	1.467	99.451
Toba@3	31.358	13.489	0.718	0.349	5.773	10.999	0	0.522	16.266	0	0.772	9.928	1.031	1.913	1.073	3.59	0.045	1.663	99.489
Toba@4	31.298	13.285	0.71	0.391	5.7	10.919	0	0.295	16.74	0.116	0.804	9.734	1.055	1.932	1.116	3.522	0.141	1.624	99.492
Toba@5	31.886	14.153	1.146	0.147	7.473	11.558	0	0.178	15.111	0.185	0.457	10.39	1.194	1.018	0.967	2.617	0.204	1.542	100.247
Toba@6	32.139	14.192	1.133	0.109	7.322	11.474	0	0.276	15.403	0	0.463	10.54	1.323	1.227	0.996	2.806	0.226	1.574	101.307
Toba@7	31.423	13.676	0.584	0.408	5.041	10.686	0	0.571	16.904	0.197	0.906	10.124	0.883	2.47	1.008	3.902	0.141	1.68	100.607
Toba@8	30.768	12.714	0.742	0.392	5.846	10.932	0	0.399	17.024	0	0.905	9.563	1.458	2.497	1.056	3.328	0.187	1.636	99.538
Toba@9	31.458	13.786	0.894	0.306	6.005	10.733	0	0.347	16.267	0.06	0.77	10.303	1.167	2.467	0.952	3.231	0.136	1.568	100.53
Toba@10	31.794	13.688	0.919	0.273	5.875	10.467	0	0.297	16.283	0.047	0.768	10.35	1.201	2.659	0.924	3.286	0.158	1.607	100.62

## Sheet: Table2, session1&2
Sample spot#	time (year.month)	Primary Intensity (nA)	[U]	[Th]	Th/U	ƒ206	ƒ208	207Pb/206Pb	±σ	206Pb/238U	±σ	208Pb/232Th	±σ	TW concordia columns (Pb uncorrected)				single-spot Th-Pb age columns		inter-elemental fractionanation correction columns(original data)								Pb isotopic ratio columns (uncorrected)
			ppm	ppm		%	%	Age (Ma)	（Ma)	Age (Ma)	（Ma)	Age (Ma)	（Ma)	238U/206Pb	±σ (%)	207Pb/206Pb	±σ (%)	208Pb*/232Th	±σ (%)	206Pb/238U	±σ (%)	UO2/U	±σ (%)	208Pb/232Th	±σ (%)	ThO2/Th	±σ (%)	204Pb/206Pb	±σ (%)	208Pb/206Pb	±σ (%)
session 1
TARA@1	2017.02	9.24063	27.3094	3955.75	144.85	21.8765	1.2844			416.303	6.45849	418.03	5.69633	11.7109	1.56759	0.230872	1.2816	0.0208974	1.4946	0.819867	0.860961	4.78904	0.784809	0.154002	0.47074	1.52724	0.125457	0.0118184	2.64967	35.7683	0.84958
TARA@2	2017.02	8.95955	37.1822	6631.63	178.355	23.1468	1.12375			411.834	6.92142	423.571	6.56996	11.6496	1.67996	0.241101	1.59859	0.0211773	1.69267	0.904233	1.05174	5.23892	0.584317	0.168209	0.923532	1.61408	0.590661	0.0123861	2.58711	43.2554	1.15591
TARA@3	2017.02	8.19765	69.3062	7816.03	112.775	15.611	1.09193			416.933	7.60532	413.508	8.21336	12.6304	1.84595	0.180415	0.849299	0.020669	2.07278	0.874451	1.30055	5.48478	1.572	0.168443	1.51135	1.64469	1.17471	0.00917599	4.20979	30.023	0.823031
TARA@4	2017.02	7.56155	33.213	5220.01	157.168	12.6756	0.617747			414.112	6.18507	409.395	5.95578	13.1617	1.50123	0.156776	0.493195	0.0204613	1.55304	0.817151	0.733205	5.34542	1.49557	0.166909	0.632212	1.65152	0.490455	0.0075326	5.73208	43.09	0.470991
TARA@5	2017.02	7.12932	58.8579	9729.24	165.3	14.2655	0.672913			416.299	6.2097	404.959	6.10887	12.852	1.50721	0.16958	0.8827	0.0202374	1.58768	0.74587	0.745372	4.78155	0.507741	0.14762	0.713093	1.52277	0.505118	0.00745984	2.62562	44.5192	0.753176
TARA@6	2017.02	6.79833	37.9436	5461.77	143.945	15.8984	0.876125			407.922	6.35508	409.797	5.75862	12.8745	1.5425	0.18273	0.914571	0.0204816	1.50859	0.497554	0.814367	3.23595	0.713623	0.09673	0.513447	1.11076	0.413648	0.00767687	3.27891	38.1072	0.584992
TARA@7	2017.02	6.46678	33.1158	6106.69	184.404	18.8422	0.840232			404.609	7.19588	412.025	5.7885	12.5289	1.74657	0.206436	1.13045	0.0205941	1.51532	0.970647	1.15517	6.02097	0.896941	0.19071	0.532875	1.80704	0.334628	0.011613	4.37307	47.0924	0.841752
TARA@8	2017.02	6.19532	48.7925	7720.33	158.228	23.2456	1.27183			422.742	9.33589	414.153	5.46128	11.3247	2.26599	0.241897	0.874238	0.0207016	1.44198	1.15129	1.84895	6.44107	0.893979	0.204779	0.259022	1.88928	0.236059	0.0130167	2.11148	38.3822	1.16423
TARA@9	2017.02	5.95812	81.4738	10576.6	129.816	10.5798	0.609668			417.01	5.90988	410.675	6.02846	13.3809	1.43444	0.1399	0.707702	0.0205259	1.56947	1.17436	0.584386	7.71764	0.417488	0.23636	0.671574	2.11865	0.552228	0.00589571	4.88098	36.4422	0.529595
TARA@10	2017.02	5.72679	68.6158	9935.08	144.793	15.1701	0.824385			408.384	10.0757	417.07	9.04715	12.9709	2.44555	0.176865	0.793222	0.0208489	2.26809	1.07291	2.06509	6.86099	1.9695	0.211996	1.76975	1.93355	1.05881	0.00883462	3.36495	38.6435	1.97031
TARA@11	2017.02	5.52487	54.1047	8087.08	149.471	14.9168	0.783236			407.123	8.60563	401.943	6.09601	13.0512	2.08875	0.174825	0.763986	0.0200852	1.58477	0.960156	1.62689	6.19835	1.41876	0.187756	0.706581	1.82013	0.723958	0.00857062	2.11031	39.9946	0.833171
TARA@12	2017.02	5.35378	75.9319	10572.3	139.234	14.8734	0.837493			401.408	9.74438	409.044	8.68008	13.2497	2.36514	0.174475	0.821266	0.0204436	2.18195	1.03408	1.96921	6.75817	1.6062	0.209444	1.65791	1.94389	0.50172	0.00807661	3.30925	37.2948	0.750555
CAP@1	2017.02	8.67385	66.13	8013.76	121.182	14.9164	0.927474			300.129	7.44885	311.093	7.55534	17.8528	2.36458	0.172324	1.85582	0.0155104	2.42864	0.555518	1.96853	4.94171	2.3111	0.114644	1.97131	1.48241	1.54039	0.00857064	2.12158	33.774	2.28534
CAP@02	2017.02	8.43845	85.2925	10278.2	120.506	53.4632	4.98591			243.242	4.57327	281.375	4.27863	12.102	1.72232	0.483872	0.664902	0.0140184	1.52062	0.786862	1.11817	4.75097	1.37692	0.124594	0.547762	1.6373	0.41647	0.0295569	2.12235	22.518	0.708323
CAP@03	2017.02	7.961	122.405	8036.17	65.6522	9.08476	0.839481			286.903	4.82269	305.692	4.72516	19.9765	1.50236	0.12519	0.840323	0.0152391	1.54573	0.919323	0.735514	8.97558	0.602806	0.187741	0.614041	2.14414	0.302033	0.00545526	5.75872	22.726	0.841043
CAP@04	2017.02	7.7497	51.0449	7272.59	142.474	17.9221	1.06568			283.699	6.19654	268.576	6.0493	18.2429	2.04992	0.196617	2.13546	0.0133765	2.25236	0.522651	1.57673	4.75681	0.73827	0.102417	1.74954	1.51097	0.585313	0.00942772	4.53686	35.3169	1.62946
CAP@05	2017.02	7.42645	74.7495	9845.57	131.714	19.8913	1.14139			268.787	7.99435	283.976	4.83014	18.815	2.87707	0.212533	1.01776	0.0141489	1.7009	0.574881	2.56153	5.37491	1.4013	0.113688	0.93852	1.56704	1.16287	0.0115801	1.8446	36.5973	1.6992
CAP@06	2017.02	7.27655	67.5883	11151	164.985	21.5608	1.05411			269.078	10.0111	271.222	6.79605	18.4025	3.64333	0.226026	1.44881	0.0135091	2.50572	0.613563	3.39967	5.60326	1.67725	0.118775	2.06553	1.67049	1.32791	0.0128296	4.8664	42.9534	1.22297
CAP@07	2017.02	7.01722	209.875	15068.8	71.7988	10.2746	0.977679			272.6	5.97032	280.972	5.54065	20.7727	2.05626	0.134807	1.08783	0.0139982	1.97196	0.550044	1.58496	5.66803	1.39608	0.13033	1.36981	1.74438	1.50338	0.00571698	2.41827	22.0692	0.790662
CAP@08	2017.02	6.89205	125.505	8254.15	65.7672	6.7998	0.773053			280.717	4.7244	265.058	3.86418	20.94	1.50463	0.106722	0.595608	0.0132001	1.45786	0.440956	0.740138	4.61124	0.423254	0.0980014	0.336355	1.48011	0.236002	0.00350858	4.80616	18.4717	0.568881
CAP@09	2017.02	6.67636	64.4514	11019.7	170.976	19.0114	1.01895			277.889	5.97716	262.73	3.81447	18.3856	2.01443	0.205421	1.11086	0.0130834	1.45186	0.38576	1.53031	3.57138	0.802517	0.0743468	0.309296	1.21756	0.146274	0.0109967	6.57569	39.1814	0.705576
CAP@10	2017.02	6.5713	73.2803	11511	157.082	16.6884	0.924007			282.194	4.44926	266.403	3.87854	18.6181	1.38469	0.186646	1.35018	0.0132675	1.45589	0.420835	0.448636	3.93308	0.610634	0.0822339	0.327708	1.298	0.122052	0.0090373	5.44332	37.9279	0.832805
CAP@11	2017.02	6.37893	125.248	17463.5	139.431	17.3874	0.954281			279.09	4.87843	275.418	4.08645	18.6718	1.577	0.192295	0.777795	0.0137196	1.48372	0.615815	0.877961	5.70285	1.17863	0.121923	0.43498	1.68568	0.281648	0.0101637	2.68381	38.2629	0.794485
CAP@12	2017.02	6.28834	255.652	15770.2	61.6863	6.5173	0.732428			273.879	4.58937	269.053	4.00361	21.5393	1.49648	0.104439	0.574279	0.0134004	1.48804	0.543168	0.723422	5.79944	0.622998	0.120219	0.449484	1.69846	0.226351	0.00395721	2.94621	18.6863	0.343384
CAP@13	2017.02	6.1131	350.401	14936.4	42.6268	5.46026	0.920709			274.357	4.53102	267.456	4.14066	21.7441	1.46934	0.0958958	0.983582	0.0133203	1.54816	0.432594	0.665476	4.69479	0.246311	0.0978691	0.620148	1.46795	0.310302	0.00329505	4.03331	12.454	0.594023
CAP@14	2017.02	6.05004	101.597	14844.3	146.11	13.6351	0.737529			279.69	4.84233	283.058	4.05731	19.477	1.55851	0.161967	0.969055	0.0141028	1.43338	0.428607	0.84431	4.18217	0.503793	0.088063	0.205809	1.3098	0.241865	0.00731763	4.52309	38.8237	0.91144
CAP@15	2017.02	5.91188	120.781	14458	119.704	14.7512	0.860126			278.175	4.94121	291.154	4.14188	19.3323	1.60832	0.170989	0.864143	0.0145091	1.42257	0.65576	0.933064	6.26837	0.783111	0.137986	0.107176	1.77518	0.0805321	0.00797283	2.14486	36.0152	0.517668
CAP@16	2017.02	5.79853	71.3252	11424.5	160.174	15.7783	0.862781			273.638	4.60891	269.173	4.00703	19.423	1.50612	0.179289	1.40061	0.0134064	1.48865	0.340502	0.743166	3.33758	0.871842	0.0683872	0.451487	1.1286	0.187111	0.009371	1.59963	38.4041	0.548793
CAP@17	2017.02	5.66162	94.775	12009.4	126.715	15.4848	0.86561			280.694	5.90758	287.602	5.01622	18.9902	1.96493	0.176918	1.07543	0.0143308	1.74415	0.713125	1.46453	6.68224	1.13198	0.144865	1.01481	1.85426	0.541761	0.00939795	2.2682	37.5667	0.985665
CAP@18	2017.02	5.58707	117.311	14148.9	120.61	15.689	0.955966			276.69	4.67351	281.306	4.58034	19.2245	1.51145	0.178568	0.482665	0.0140149	1.62824	0.596764	0.753913	5.69043	0.755092	0.12416	0.799338	1.68321	0.505257	0.00920323	3.05513	34.4646	0.533684
CAP@19	2017.02	5.46644	78.1443	10282.4	131.582	16.0307	0.899145			284.655	7.03978	277.409	4.41618	18.5993	2.35535	0.18133	0.531914	0.0138194	1.59194	0.678149	1.95744	6.23758	0.498392	0.130821	0.722519	1.7656	0.401572	0.00904428	3.62948	37.4406	0.870987
CAP@20	2017.02	5.40784	136.771	15623.5	114.231	24.6594	1.6845			285.663	10.1003	279.433	4.34478	16.6278	3.4544	0.25107	4.52093	0.013921	1.55485	0.75457	3.19637	6.20586	1.20885	0.136659	0.636666	1.80266	0.333174	0.0148526	7.17098	30.742	2.40238
session 2																	0.3
TARA@1	2017.09	7.41268	213.415	12354.4	57.8894	6.82077	0.843857			415.725	4.1659	413.619	5.79698	14.0843	0.9395	0.109628	0.438884	0.0207865	1.40153	3.35659	0.678351	22.4242	0.789911	0.640465	1.04873	4.22977	0.44841	0.00389665	2.27389	16.974	0.0993542
TARA@2	2017.09	7.24025	195.726	11541.4	58.967	10.4587	1.31561			412.997	3.86007	408.212	5.06148	13.6051	0.867211	0.138924	0.439373	0.0205145	1.23991	3.59994	0.574069	23.2324	0.36277	0.66771	0.820338	4.42906	0.305228	0.00575958	1.47979	16.6944	0.384936
TARA@3	2017.09	7.31074	71.545	12667.9	177.063	15.3531	0.68471			415.76	5.61659	411.326	5.31913	12.8525	1.30517	0.178338	0.666028	0.0206641	1.29317	3.31961	1.1318	20.2359	0.988732	0.567037	0.898803	3.80782	0.29113	0.00862196	1.87596	47.0877	0.519828
TARA@4	2017.09	7.49623	56.4291	8590.57	152.236	19.9662	1.09087			415.541	4.77314	413.32	5.2827	12.1765	1.09449	0.215488	1.02885	0.0207642	1.27811	3.3913	0.880572	19.5851	1.29939	0.559394	0.877005	3.72984	0.346294	0.0107477	1.90563	38.4363	0.61286
TARA@5	2017.09	7.48082	67.2736	11450	170.2	40.1214	2.58119			416.665	5.24667	417.071	5.50462	9.07054	1.21	0.377797	1.37122	0.0209561	1.31983	4.71311	1.02059	20.2764	1.13524	0.590451	0.936758	3.83295	0.322934	0.0221288	2.40061	32.6419	0.281691
TARA@6	2017.09	7.53871	89.7062	15717.9	175.215	12.2206	0.53192			420.984	3.60106	411.322	5.67149	13.1739	0.781142	0.153113	0.867391	0.0206629	1.37884	3.14902	0.433224	19.6756	0.624404	0.554541	1.01822	3.73606	0.3571	0.00734793	3.25951	48.2465	0.581222
TARA@7	2017.09	7.57203	68.3966	13022.5	190.397	18.8043	0.812003			421.788	4.5071	412.697	5.50492	12.1378	1.01012	0.206131	0.993954	0.0207346	1.33389	3.57177	0.773197	20.5626	0.608939	0.579742	0.956466	3.8695	0.409003	0.0107162	2.15897	48.6317	0.491735
TARA@8	2017.09	7.5459	76.6195	11522.3	150.384	15.3299	0.803782			413.721	4.29634	408.462	5.71827	12.8962	0.978212	0.178152	0.4938	0.020521	1.39995	3.45563	0.731026	21.1375	0.644077	0.588557	1.04663	3.96143	0.40331	0.00880895	1.86007	40.0518	0.192981
TARA@9	2017.09	7.70526	44.0024	8613.5	195.751	20.9998	0.905662			416.25	4.73458	411.381	5.45702	12.0044	1.0827	0.223811	1.02652	0.0206647	1.32651	3.39937	0.86588	19.3541	0.587079	0.544463	0.946151	3.66057	0.382118	0.0118708	4.58103	48.6932	0.728446
TARA@10	2017.09	7.73076	57.9762	9027.12	155.704	17.0639	0.881505			419.996	4.66368	409.924	6.0271	12.4738	1.05428	0.192116	0.573971	0.0205924	1.4703	3.34615	0.830061	19.7964	0.668683	0.560115	1.13901	3.77022	0.468733	0.00988017	1.43251	40.6512	0.360983
TARA@11	2017.09	7.97242	80.9267	13317.4	164.562	13.4884	0.63362			418.031	4.80586	410.888	5.50321	13.0703	1.09552	0.163322	0.523341	0.0206409	1.33935	3.21766	0.881853	19.9467	0.691601	0.555423	0.964062	3.74167	0.34717	0.00785263	2.97237	44.7043	0.300179
TARA@12	2017.09	7.87987	78.551	11033.9	140.468	12.8948	0.7043			415.763	3.48473	408.131	5.73109	13.2359	0.762228	0.158542	0.554343	0.0205015	1.40423	3.16789	0.39811	19.8869	0.67132	0.556521	1.05234	3.76945	0.431199	0.00738376	1.52482	38.4483	0.260491
TARA@13	2017.09	7.85108	92.5044	14636	158.219	13.5872	0.664402			412.485	4.39567	410.578	5.59905	13.2253	1.00703	0.164118	0.498754	0.0206266	1.3637	3.24159	0.769164	20.3336	0.482723	0.570766	0.997618	3.83797	0.411346	0.00747778	2.44394	42.9455	0.312079
TARA@14	2017.09	7.98275	67.028	11382	169.81	17.8159	0.851875			420.054	5.77943	409.983	5.22374	12.353	1.33099	0.198172	0.5624	0.0205956	1.27413	3.4152	1.16148	20.0095	0.695825	0.561524	0.871197	3.77944	0.368297	0.0103057	1.8285	43.9189	0.509778
TARA@15	2017.09	7.8108	72.2614	10629.8	147.103	16.1757	0.875165			413.222	3.96177	411.798	5.44784	12.8277	0.893137	0.184963	0.512864	0.0206866	1.32294	3.2154	0.612531	19.5624	0.748551	0.552295	0.941135	3.70641	0.374023	0.00913036	2.23991	38.8144	0.258912
TARA@16	2017.09	7.61021	86.6966	12779.9	147.41	13.0122	0.678332			417.941	6.56448	408.355	5.00092	13.1311	1.5315	0.159487	0.751529	0.0205135	1.22465	3.28049	1.38672	20.4311	1.06529	0.563993	0.79708	3.81483	0.352556	0.00720483	1.33671	40.2835	0.416987
TARA@17	2017.09	7.27217	67.0653	10191.3	151.961	12.4756	0.627338			419.097	5.33136	399.234	4.62005	13.1914	1.22342	0.155166	0.9138	0.0200506	1.15723	3.17321	1.03646	19.8532	1.18522	0.549735	0.689017	3.80686	0.219047	0.00713728	2.58356	41.7619	0.358235
TARA@18	2017.09	7.48402	65.4588	11289.9	172.474	16.0321	0.739547			412.204	7.1182	402.441	3.97348	12.872	1.69132	0.183807	0.783426	0.0202134	0.987345	3.26289	1.56143	19.9201	1.25447	0.555398	0.332289	3.81049	0.476948	0.00928327	2.58433	45.5245	0.222344
SQ-51@1	2017.09	7.67037	1081.62	264.852	0.244867	0.0445798	0.0122343	787.224	7.9852	770.351	5.98221	786.938	11.9556	7.8746	0.693919	0.065754	0.381014	0.0397016	1.51925	4.08086	0.242948	15.5951	0.330147	0.788132	1.20154	2.80207	0.817067	2.56206e-05	7.97437	0.077614	0.481797
SQ-51@2	2017.09	7.6814	1103.44	267.322	0.242262	0.109264	0.0302866	778.367	9.5808	766.347	5.90173	764.454	9.23339	7.91312	0.686698	0.0659932	0.457705	0.0385457	1.20783	4.22958	0.221482	16.2146	0.397445	0.818581	0.770989	2.93094	0.645692	6.27953e-05	6.54622	0.0768431	0.238964
SQ-51@3	2017.09	7.69595	491.137	241.294	0.491296	0.569302	0.0738028	830.588	10.5785	816.004	7.55798	831.206	12.4456	7.36834	0.858116	0.071456	0.518546	0.0419812	1.49729	4.45506	0.560235	15.9162	0.444406	0.896903	1.17365	2.82555	0.505085	0.000327185	3.3089	0.164305	0.745739
SQ-51@4	2017.09	7.75423	1279.98	270.109	0.211025	0.180643	0.0565813	776.655	7.82713	792.498	8.74875	791.84	13.4065	7.63073	1.04746	0.0665077	0.374896	0.0399538	1.69308	3.8982	0.82139	14.4827	0.618346	0.754008	1.41495	2.56459	0.643331	0.000103818	7.92461	0.068003	1.0732
SQ-51@5	2017.09	7.55764	1365.05	271.757	0.199082	0.042869	0.0148578	772.961	7.91275	772.026	6.37388	767.935	10.6283	7.8566	0.748401	0.0652983	0.376675	0.0387246	1.384	3.82117	0.370951	14.6111	0.289683	0.727318	1.02519	2.65676	0.760871	2.46373e-05	15.5024	0.0614567	0.274961
SQ-51@6	2017.09	7.55099	581.913	248.804	0.427562	0.144742	0.0234422	830.954	6.64382	833.031	8.06146	822.802	9.93274	7.23878	0.902761	0.0679726	0.320511	0.0415481	1.20718	4.42694	0.62648	15.5534	0.392191	0.846152	0.769961	2.83872	0.526009	8.31851e-05	11.7576	0.131515	0.421054
SQ-51@7	2017.09	7.50061	1007.75	267.965	0.265905	0.0675082	0.0179502	781.133	7.31604	768.512	6.27915	746.006	9.79548	7.89278	0.738958	0.065747	0.349073	0.0375982	1.31305	3.74827	0.351509	14.4072	0.407219	0.726629	0.927181	2.71947	0.452645	3.87978e-05	6.26155	0.0801066	0.357527
SQ-51@8	2017.09	7.53401	349.042	197.46	0.565721	0.0999213	0.012313	844.562	8.01573	837.533	7.03281	825.874	11.0457	7.20053	0.76393	0.068041	0.386821	0.0417064	1.33745	3.99091	0.401359	14.0116	0.338346	0.781825	0.961429	2.65839	0.461211	5.7426e-05	6.98474	0.172852	0.610522
SQ-51@9	2017.09	7.59417	878.144	274.283	0.312344	0.0451845	0.0101216	775.042	6.89247	765.225	6.34361	753.058	10.5671	7.93052	0.752131	0.065381	0.328246	0.0379603	1.40322	4.17699	0.37842	16.0552	0.444683	0.804593	1.051	2.98151	0.749312	2.59681e-05	10.607	0.0950868	0.189269
SQ-51@10	2017.09	7.63392	990.081	272.799	0.275532	0.30558	0.0710546	789.986	8.46537	776.782	6.58762	785.647	13.8109	7.78505	0.773109	0.0679138	0.40827	0.0396352	1.75789	4.08374	0.418565	15.4356	0.392963	0.819871	1.49189	2.75052	0.784985	0.000175621	4.09004	0.0916036	2.04328
SQ-51@11	2017.09	7.66505	1609.89	241.701	0.150135	0.14224	0.0595015	784.457	7.48821	767.532	5.99348	800.152	12.1264	7.89755	0.69875	0.0664441	0.358549	0.0403816	1.5155	3.85372	0.256422	14.8038	0.185656	0.77883	1.19679	2.60883	0.690682	8.17469e-05	5.13166	0.0509181	0.719813
SQ-51@12	2017.09	7.68375	926.956	266.642	0.287653	0.395743	0.0875247	774.546	10.2904	770.842	6.41798	768.163	10.6465	7.84162	0.756105	0.0681526	0.496855	0.0387363	1.38596	4.21338	0.386258	16.0153	0.371804	0.849693	1.02783	2.85538	0.4895	0.000227439	6.82575	0.0963081	0.319957
SQ-51@13	2017.09	7.76448	874.436	264.221	0.302161	4.91795	0.570464	778.837	8.85852	579.661	5.32661	516.046	5.91036	10.1058	0.850232	0.105705	0.482496	0.0258601	1.14531	3.05911	0.548083	15.0273	0.433709	1.11569	0.668802	2.66057	1.09068	0.00282641	1.28923	0.183627	0.673582
SQ-51@14	2017.09	7.69353	1227.38	255.519	0.208182	0.0360031	0.0115212	774.159	7.88589	775.646	6.20502	800.239	9.6198	7.81823	0.720037	0.0652807	0.375362	0.040386	1.20211	4.25719	0.309763	16.1286	0.186432	0.804302	0.76199	2.81222	0.687765	2.06914e-05	11.4248	0.0665615	0.19803
SQ-51@15	2017.09	7.722	1229.72	305.301	0.248268	0.168849	0.0445725	775.444	7.63475	767.962	5.97063	776.604	9.77112	7.89076	0.694934	0.0663765	0.365442	0.0391702	1.25818	4.17495	0.245833	15.9706	0.325592	0.821368	0.847689	2.85788	0.826568	9.70398e-05	6.1145	0.0806886	0.231375
SQ-51@16	2017.09	7.65598	1127.98	286.621	0.2541	0.0667632	0.0175357	779.491	8.56263	774.897	6.53931	794.875	9.22006	7.82385	0.768531	0.0656902	0.408434	0.04011	1.15993	4.31209	0.410048	16.339	0.284382	0.815664	0.693543	2.85062	0.418921	3.83696e-05	11.3444	0.0810948	0.122523
SQ-51@17	2017.09	7.5772	1086.41	313.742	0.288789	0.157759	0.0359908	788.317	6.92489	763.492	6.66846	776.129	10.4723	7.94065	0.800836	0.0666874	0.331979	0.0391457	1.34929	4.125	0.467801	15.8832	0.492803	0.819095	0.977831	2.87575	0.503217	9.06662e-05	6.70265	0.0933648	1.20517
SQ-51@18	2017.09	7.69181	1354.72	259.347	0.191439	0.146202	0.0491629	776.551	6.63361	774.596	6.00573	792.854	9.74705	7.82086	0.692554	0.0662307	0.317289	0.040006	1.22935	4.15063	0.239022	15.7467	0.228886	0.79754	0.804287	2.71633	0.514038	8.40241e-05	4.13555	0.0633425	0.313385
SQ-51@19	2017.09	7.54121	978.959	254.605	0.260078	0.0687887	0.017816	778.373	7.1395	778.745	5.95903	787.88	9.46322	7.78266	0.681197	0.0656717	0.340519	0.03975	1.20109	4.31341	0.203786	16.2614	0.221432	0.807903	0.760386	2.84844	0.766838	3.95337e-05	13.6053	0.0822408	0.373542
SQ-51@20	2017.09	7.47057	1144.05	252.886	0.221045	0.0622436	0.0190535	776.125	6.60558	771.209	5.86241	778.382	10.3995	7.86392	0.675518	0.0655501	0.314857	0.0392616	1.33603	4.13798	0.183914	15.7835	0.178939	0.796422	0.959455	2.84007	0.535988	3.57722e-05	7.48328	0.0695824	0.289807
Daibosatsu@1	2017.09	7.35314	236.205	10730.8	45.43	61.3363	22.2104			11.5786	2.32088	11.5694	0.37283	212.886	1.4254	0.597214	0.833383	0.000572559	1.1768	0.277888	0.61289	22.5043	0.238849	0.0232498	0.721406	4.33968	0.332744	0.0381624	2.38724	5.79936	0.923036
Daibosatsu@2	2017.09	7.47229	224.937	10074.5	44.788	61.8207	22.8722			11.8146	2.36856	11.6948	0.383791	207.219	1.55989	0.587882	1.18405	0.000578768	1.3303	0.291778	1.1592	22.9381	0.709649	0.0237871	0.95145	4.3537	0.318595	0.0388974	2.55278	5.67602	0.837186
Daibosatsu@3	2017.09	7.45492	235.426	11103.9	47.165	62.0491	21.7168			11.0596	2.21741	11.347	0.362318	212.543	1.31726	0.581167	0.956241	0.000561551	1.09345	0.271048	0.64397	22.3241	0.469583	0.0225105	0.575507	4.31356	0.31926	0.0368185	1.28248	6.00011	0.337931
Daibosatsu@4	2017.09	7.3817	218.371	9978.81	45.6967	62.9917	23.5083			11.4996	2.30661	11.4818	0.377066	214.947	1.15657	0.580694	0.832268	0.000568223	1.33598	0.2955	0.928726	23.0034	0.894631	0.0240244	0.959377	4.43446	0.400044	0.0377582	1.2581	5.62705	0.865586
Daibosatsu@5	2017.09	7.16789	243.577	10934.5	44.8913	61.8291	22.2266			11.1781	2.24046	11.4549	0.373849	219.941	1.04784	0.582767	0.862358	0.000566893	1.28508	0.274591	0.362564	22.8036	0.432404	0.023352	0.887124	4.39628	0.329686	0.0380549	1.44596	5.8417	0.964542
Daibosatsu@6	2017.09	7.27601	231.039	10424.5	45.1201	61.5902	22.5919			11.5091	2.3069	11.4106	0.366766	207.276	1.35242	0.592856	0.908523	0.000564699	1.15386	0.271228	0.609215	22.0159	0.519904	0.022888	0.683339	4.31278	0.132171	0.0380026	2.45793	5.72504	0.434506
Daibosatsu@7	2017.09	7.42426	230.38	10407.6	45.176	61.6448	22.3065			11.6227	2.33165	11.7236	0.380222	221.019	1.17525	0.584676	0.887352	0.000580193	1.23226	0.288643	0.876731	23.1102	0.442901	0.0237263	0.808717	4.36285	0.292373	0.0348605	1.45882	5.80343	0.804637
Daibosatsu@8	2017.09	7.37458	220.992	10142.4	45.895	62.4185	22.7484			11.6807	2.34742	11.7212	0.386136	220.364	1.44538	0.580436	0.876683	0.000580076	1.36111	0.30466	1.2111	23.652	0.41382	0.0245378	0.994073	4.47691	0.27294	0.0371084	2.21158	5.76211	0.627171
Daibosatsu@9	2017.09	7.35471	229.557	10509.1	45.7799	63.4939	22.8251			11.1444	2.23489	11.6822	0.375001	208.127	1.51995	0.582694	0.696383	0.000578141	1.14206	0.289681	1.03211	22.9448	0.396054	0.0239277	0.66323	4.38412	0.239062	0.0388413	3.15862	5.84168	1.12892
Daibosatsu@10	2017.09	7.47745	221.165	9699.89	43.8583	63.123	23.7499			11.48	2.30149	11.5963	0.37482	206.543	1.48615	0.599979	0.927393	0.000573889	1.20309	0.287713	1.05323	22.6265	0.726984	0.0240861	0.763536	4.39186	0.257082	0.0374819	2.9867	5.58142	0.863298
Daibosatsu@11	2017.09	7.37364	234.642	10461.5	44.585	60.8111	22.685			11.8891	2.3957	11.484	0.370725	222.758	1.6753	0.588345	1.08848	0.000568332	1.19214	0.280346	1.46073	22.5263	0.523844	0.0233631	0.746161	4.36424	0.318397	0.0374587	2.7891	5.62941	0.987943
Daibosatsu@12	2017.09	7.45609	236.601	11471.2	48.4833	61.403	21.8169			11.7905	2.36023	11.4462	0.369649	200.187	1.18494	0.604713	1.1728	0.000566461	1.19553	0.281121	0.449312	21.9226	0.660262	0.0225494	0.751572	4.28101	0.35486	0.0377323	3.49397	5.9104	0.578347
Daibosatsu@13	2017.09	7.50147	216.075	9887.08	45.7577	61.9314	22.5549			11.2869	2.26187	11.2439	0.373972	221.393	1.64057	0.584255	1.43578	0.000556448	1.43603	0.266023	0.594433	21.7493	0.604438	0.0225332	1.09441	4.3111	0.348465	0.0394632	1.73761	5.76621	0.683902
Daibosatsu@14	2017.09	7.45437	226.508	10273.7	45.357	62.7709	23.1701			11.4226	2.29122	11.4537	0.373048	209.918	1.46289	0.59094	0.866793	0.000566833	1.26809	0.279595	1.0833	22.1269	0.436184	0.0233047	0.862339	4.33966	0.308265	0.0371001	2.32079	5.68918	1.11403
Daibosatsu@15	2017.09	7.37982	233.189	10673.5	45.7721	62.0006	22.1609			11.055	2.22581	11.177	0.368342	217.236	1.14886	0.583655	0.783044	0.000553137	1.36397	0.264481	1.31338	22.023	0.48916	0.0225116	0.997991	4.35115	0.316456	0.0369268	3.15581	5.87526	0.74065
Daibosatsu@16	2017.09	7.49498	212.956	8898.14	41.784	64.3581	25.6541			11.4672	2.30299	11.4335	0.364434	210.834	1.08092	0.579069	0.475147	0.000565834	1.07683	0.285517	0.661492	22.0276	0.338915	0.0239863	0.543258	4.33061	0.230442	0.0383925	2.33598	5.26824	0.830178
Daibosatsu@17	2017.09	7.46509	235.736	12083	51.2565	62.4718	20.6107			10.8512	2.18007	11.4525	0.370852	212.292	1.76076	0.573933	1.51637	0.000566773	1.21891	0.278926	1.35651	22.5523	0.533178	0.0228226	0.788231	4.38759	0.318178	0.0383383	1.90063	6.36517	1.23652
Daibosatsu@18	2017.09	7.59519	221.047	10193.3	46.1139	63.8126	23.3532			11.2845	2.26426	11.5206	0.371943	206.893	1.44077	0.593995	0.752184	0.000570146	1.19296	0.289455	1.11451	22.4206	0.478588	0.0236377	0.747471	4.36351	0.234297	0.0369307	2.14414	5.73824	1.07325
Daibosatsu@19	2017.09	7.6246	240.039	10809.6	45.0329	61.5605	22.0915			11.2351	2.25366	11.4535	0.375925	215.067	1.15851	0.578491	0.836985	0.00056682	1.33147	0.260705	1.05953	21.7197	0.549385	0.0224912	0.953089	4.25464	0.261261	0.0374692	2.31796	5.8519	0.895978

## Sheet: Table2. session3
Sample spot#	time (year.month)	Primary Intensity (nA)	[U]	[Th]	Th/U	ƒ208	208Pb/232Th	±σ	single-spot Th-Pb age columns		inter-elemental fractionanation correction columns(original data)				Pb isotopic ratio column (uncorrected)
			ppm	ppm		%	Age (Ma)	（Ma)	208Pb*/232Th	±σ (%)	208Pb/232Th	±σ (%)	ThO2/Th	±σ (%)	208Pb/207Pb	±σ (%)
session 3
TARA@1	2018.04	4.96137	70.5559	10586.8	150.048	0.954405	419.418	6.00021	0.0209675	1.45636	0.553052	0.27584	3.34326	0.289964	255.657	0.650018
TARA@2	2018.04	5.27798	74.1461	10667.4	143.87	0.985097	424.352	5.96601	0.0212168	1.44806	0.552332	0.227986	3.29559	0.126049	247.691	0.494184
TARA@3	2018.04	5.37749	79.9785	11230.2	140.415	0.901421	415.045	5.95781	0.0207466	1.44607	0.534706	0.214994	3.2634	0.100709	270.684	0.541381
TARA@4	2018.04	5.66194	71.7041	8577.55	119.624	1.92835	405.356	6.00041	0.0202574	1.45641	0.468204	0.276105	2.87231	0.347187	126.533	0.968085
TARA@5	2018.04	4.90919	64.9471	9599.95	147.812	1.13711	418.003	5.96128	0.020896	1.44691	0.519211	0.220576	3.13021	0.27007	214.58	0.806041
TARA@6	2018.04	3.75074	51.6726	8351.75	161.628	1.07037	408.404	6.08401	0.0204113	1.4767	0.534772	0.368438	3.31514	0.459606	227.958	0.897051
TARA@7	2018.04	4.05757	67.8615	10815.4	159.375	1.00031	416.662	6.11881	0.0208283	1.48515	0.535793	0.400957	3.25331	0.198037	243.925	0.917051
TARA@8	2018.04	3.77766	71.7782	11337	157.944	0.905638	411.292	6.17358	0.0205571	1.49844	0.54313	0.447693	3.35098	0.351513	269.423	0.635218
TARA@9	2018.04	4.0179	66.7022	10195.4	152.85	0.876546	401.872	6.01956	0.0200816	1.46106	0.537968	0.299647	3.40206	0.152898	278.365	0.298971
TARA@10	2018.04	4.0754	43.3271	6426.81	148.332	1.10659	408.079	6.22156	0.0203949	1.51009	0.545909	0.485246	3.39061	0.492025	220.496	1.10816
TARA@11	2018.04	5.26483	220.526	5543.83	25.1391	2.65781	407.945	5.98155	0.0203881	1.45183	0.653437	0.250834	4.04197	0.201429	91.8049	0.296626
TARA@12	2018.04	4.84403	194.265	7394.49	38.0639	1.85898	418.55	6.07988	0.0209237	1.4757	0.672482	0.364403	4.08969	0.305675	131.255	0.731595
TARA@13	2018.04	5.31584	216.355	6947.88	32.1133	2.24172	409.69	6.03536	0.0204762	1.46489	0.630977	0.317822	3.89338	0.348314	108.845	0.220881
TARA@14	2018.04	5.03898	211.653	5795.2	27.3807	3.26438	409.118	6.01599	0.0204474	1.46019	0.611605	0.295402	3.72919	0.519314	74.7462	0.416949
TARA@15	2018.04	3.75364	67.1035	9651.4	143.829	0.923086	406.571	6.18335	0.0203188	1.50081	0.528699	0.455562	3.29609	0.532793	264.331	0.853241
TARA@16	2018.04	3.67236	65.7926	10510.1	159.747	0.763559	411.862	6.11839	0.0205859	1.48505	0.53879	0.400578	3.32247	0.317996	319.556	1.36179
TARA@17	2018.04	3.8519	65.7752	10611.9	161.336	0.835846	412.176	6.03188	0.0206018	1.46405	0.553135	0.313913	3.41168	0.403808	291.92	0.503024
TOBA@1	2018.04	4.02604	43.3764	15099.9	348.113	71.8766	0.773799	0.078245	3.82845e-05	10.1118	0.00388612	0.462085	3.67578	0.332414	3.4825	0.999561
TOBA@2	2018.04	4.06867	47.0515	14986.6	318.514	70.4343	0.849173	0.0860473	4.20137e-05	10.1331	0.00401228	0.802643	3.63282	0.368133	3.55381	0.723243
TOBA@3	2018.04	4.08761	57.2111	16232.9	283.737	68.3849	0.840528	0.085008	4.1586e-05	10.1136	0.0039124	0.50098	3.84076	0.479056	3.66031	1.06046
TOBA@4	2018.04	4.10075	45.472	16160.1	355.386	67.7036	0.817216	0.0826845	4.04326e-05	10.1178	0.00362729	0.579075	3.73457	0.402909	3.69715	0.631579
TOBA@5	2018.04	3.97613	94.1757	20385.9	216.466	64.1945	0.824899	0.0834615	4.08127e-05	10.1178	0.00348811	0.578673	3.9594	0.286401	3.89925	1.15419
TOBA@6	2018.04	4.03206	43.0043	15264.7	354.957	70.1835	0.833775	0.0843302	4.12519e-05	10.1143	0.00364049	0.513126	3.36903	0.308236	3.56651	1.13408
TOBA@7	2018.04	3.83234	44.8344	15370.3	342.825	70.3323	0.829309	0.0838553	4.10309e-05	10.1115	0.00368657	0.454769	3.416	0.504482	3.55896	0.869459
TOBA@8	2018.04	4.02377	25.0077	10181.8	407.147	73.5436	0.810436	0.0820497	4.00971e-05	10.1241	0.0041067	0.680704	3.47638	0.48359	3.40356	1.16626
TOBA@9	2018.04	3.79643	38.2408	14711	384.695	69.718	0.859473	0.0869928	4.25233e-05	10.1216	0.00378184	0.642499	3.45377	0.310595	3.59032	1.48227
TOBA@10	2018.04	3.6614	48.5998	16689	343.396	69.7338	0.806387	0.0815352	3.98968e-05	10.1112	0.00350454	0.448246	3.40638	0.375412	3.58951	0.543513
TOBA@11	2018.04	3.64701	55.1329	17652	320.172	70.7413	0.804876	0.0813957	3.9822e-05	10.1128	0.0039018	0.483981	3.69244	0.536863	3.53839	1.23093
TOBA@12	2018.04	3.7843	52.5925	18517.6	352.096	69.359	0.79337	0.0802778	3.92528e-05	10.1186	0.00365529	0.592208	3.67391	0.496326	3.6089	1.2494
TOBA@13	2018.04	3.92363	55.2368	18650.7	337.65	67.3147	0.833331	0.0843022	4.12299e-05	10.1163	0.0035818	0.551831	3.65485	0.472456	3.71851	0.845525
TOBA@14	2018.04	3.81599	49.8597	16196.7	324.846	70.1839	0.827407	0.0837987	4.09368e-05	10.1279	0.00394768	0.734142	3.70412	0.397794	3.56649	0.437412
TOBA@15	2018.04	3.8422	57.1051	15284.7	267.66	68.0835	0.91752	0.0927376	4.53953e-05	10.1074	0.00431271	0.353565	3.92068	0.404098	3.67652	0.901375
TOBA@16	2018.04	3.75982	102.553	16518	161.067	71.4673	0.908569	0.0919811	4.49524e-05	10.1237	0.00509268	0.674685	4.19827	0.409274	3.50244	0.690514
TOBA@17	2018.04	3.7732	68.0551	19191.6	282.001	67.9167	0.841146	0.0851395	4.16166e-05	10.1218	0.00368569	0.645665	3.65746	0.319123	3.68554	0.576902
TOBA@18	2018.04	3.89516	52.9741	17634.2	332.883	67.5405	0.801447	0.0811255	3.96524e-05	10.1224	0.00345405	0.654035	3.63832	0.152964	3.70607	1.24899
TOBA@19	2018.04	3.27486	61.3553	20132.4	328.127	65.8392	0.841089	0.0851949	4.16137e-05	10.1291	0.00357258	0.751117	3.78334	0.421905	3.80184	0.817538
TOBA@20	2018.04	3.92551	56.1725	17670.5	314.576	69.189	0.794341	0.0804182	3.93008e-05	10.1239	0.00372546	0.677003	3.7667	0.54077	3.61777	0.875561
